# Supplementary material for: Interviewer effects on non-response propensity in longitudinal surveys: a multilevel modelling approach
Source: PubMed Central journal article supplement (PMC4282753; doi:10.1111/rssa.12049), 2014-02-19
Supplement: rssa0178-0083-sd1.pdf [file rssa0178-0083-sd1.pdf]

**Table 1: Frequency Distribution of the Response Outcome by Area Categorical Variables for the Individual-Level Data**

| Category                                                                                                  | Statistic | Productive |          | Total  |
|-----------------------------------------------------------------------------------------------------------|-----------|------------|----------|--------|
|                                                                                                           |           | Interview  | Refusals |        |
| <i>Government Office Region</i>                                                                           |           |            |          |        |
| North East                                                                                                | Count     | 349        | 28       | 377    |
|                                                                                                           | %         | 92.6%      | 7.4%     | 100.0% |
| North West & Merseyside                                                                                   | Count     | 635        | 74       | 709    |
|                                                                                                           | %         | 89.6%      | 10.4%    | 100.0% |
| Yorkshire & Humber                                                                                        | Count     | 547        | 44       | 591    |
|                                                                                                           | %         | 92.6%      | 7.4%     | 100.0% |
| East Midlands                                                                                             | Count     | 470        | 33       | 503    |
|                                                                                                           | %         | 93.4%      | 6.6%     | 100.0% |
| West Midlands                                                                                             | Count     | 587        | 49       | 636    |
|                                                                                                           | %         | 92.3%      | 7.7%     | 100.0% |
| South West                                                                                                | Count     | 535        | 47       | 582    |
|                                                                                                           | %         | 91.9%      | 8.1%     | 100.0% |
| Eastern                                                                                                   | Count     | 439        | 40       | 479    |
|                                                                                                           | %         | 91.6%      | 8.4%     | 100.0% |
| London                                                                                                    | Count     | 403        | 52       | 455    |
|                                                                                                           | %         | 88.6%      | 11.4%    | 100.0% |
| South East                                                                                                | Count     | 633        | 69       | 702    |
|                                                                                                           | %         | 90.2%      | 9.8%     | 100.0% |
| Wales                                                                                                     | Count     | 360        | 35       | 395    |
|                                                                                                           | %         | 91.1%      | 8.9%     | 100.0% |
| Scotland                                                                                                  | Count     | 473        | 30       | 503    |
|                                                                                                           | %         | 94.0%      | 6.0%     | 100.0% |
| <i>London Indicator</i>                                                                                   |           |            |          |        |
| Not London                                                                                                | Count     | 5028       | 449      | 5477   |
|                                                                                                           | %         | 91.8%      | 8.2%     | 100.0% |
| London                                                                                                    | Count     | 403        | 52       | 455    |
|                                                                                                           | %         | 88.6%      | 11.4%    | 100.0% |
| <i>How much of a problem are vandalism, graffiti and other deliberate damage to property or vehicles?</i> |           |            |          |        |
| Very big problem/Fairly big problem                                                                       | Count     | 945        | 77       | 1022   |
|                                                                                                           | %         | 92.5%      | 7.5%     | 100.0% |
| Not a very big problem                                                                                    | Count     | 1747       | 142      | 1889   |
|                                                                                                           | %         | 92.5%      | 7.5%     | 100.0% |
| Not a problem at all/It happens but it is not a problem/Don't know                                        | Count     | 2739       | 282      | 3021   |
|                                                                                                           | %         | 90.7%      | 9.3%     | 100.0% |
| <i>How much of a problem is rubbish or litter lying around?</i>                                           |           |            |          |        |
| Very big problem/Fairly big problem                                                                       | Count     | 988        | 89       | 1077   |
|                                                                                                           | %         | 91.7%      | 8.3%     | 100.0% |
| Not a very big problem                                                                                    | Count     | 1943       | 158      | 2101   |
|                                                                                                           | %         | 92.5%      | 7.5%     | 100.0% |
| Not a problem at all/It happens but it is not a problem/Don't know                                        | Count     | 2500       | 254      | 2754   |
|                                                                                                           | %         | 90.8%      | 9.2%     | 100.0% |

*How much of a problem are teenagers hanging around on the street?*

|                                                                    |       |       |      |        |
|--------------------------------------------------------------------|-------|-------|------|--------|
| Very big problem/Fairly big problem                                | Count | 1331  | 107  | 1438   |
|                                                                    | %     | 92.6% | 7.4% | 100.0% |
| Not a very big problem                                             | Count | 1518  | 120  | 1638   |
|                                                                    | %     | 92.7% | 7.3% | 100.0% |
| Not a problem at all/It happens but it is not a problem/Don't know | Count | 2582  | 274  | 2856   |
|                                                                    | %     | 90.4% | 9.6% | 100.0% |

*How much of a problem are troublesome neighbours?*

|                                                                    |       |       |      |        |
|--------------------------------------------------------------------|-------|-------|------|--------|
| Very big problem/Fairly big problem                                | Count | 386   | 35   | 421    |
|                                                                    | %     | 91.7% | 8.3% | 100.0% |
| Not a very big problem                                             | Count | 682   | 57   | 739    |
|                                                                    | %     | 92.3% | 7.7% | 100.0% |
| Not a problem at all/It happens but it is not a problem/Don't know | Count | 4363  | 409  | 4772   |
|                                                                    | %     | 91.4% | 8.6% | 100.0% |

*How much of a problem is people being attacked or harassed because of their skin colour, religion or ethnic origin?*

|                                                                    |       |       |       |        |
|--------------------------------------------------------------------|-------|-------|-------|--------|
| Very big problem/Fairly big problem                                | Count | 167   | 19    | 186    |
|                                                                    | %     | 89.8% | 10.2% | 100.0% |
| Not a very big problem                                             | Count | 546   | 34    | 580    |
|                                                                    | %     | 94.1% | 5.9%  | 100.0% |
| Not a problem at all/It happens but it is not a problem/Don't know | Count | 4718  | 448   | 5166   |
|                                                                    | %     | 91.3% | 8.7%  | 100.0% |

*How much of a problem are people being drunk or rowdy in public places?*

|                                                                    |       |       |      |        |
|--------------------------------------------------------------------|-------|-------|------|--------|
| Very big problem/Fairly big problem                                | Count | 666   | 56   | 722    |
|                                                                    | %     | 92.2% | 7.8% | 100.0% |
| Not a very big problem                                             | Count | 1207  | 103  | 1310   |
|                                                                    | %     | 92.1% | 7.9% | 100.0% |
| Not a problem at all/It happens but it is not a problem/Don't know | Count | 3558  | 342  | 3900   |
|                                                                    | %     | 91.2% | 8.8% | 100.0% |

*How much of a problem are people using or dealing drugs?*

|                                                                    |       |       |      |        |
|--------------------------------------------------------------------|-------|-------|------|--------|
| Very big problem/Fairly big problem                                | Count | 823   | 67   | 890    |
|                                                                    | %     | 92.5% | 7.5% | 100.0% |
| Not a very big problem                                             | Count | 776   | 64   | 840    |
|                                                                    | %     | 92.4% | 7.6% | 100.0% |
| Not a problem at all/It happens but it is not a problem/Don't know | Count | 3832  | 370  | 4202   |
|                                                                    | %     | 91.2% | 8.8% | 100.0% |

*Likelihood that purse/wallet is returned to you if found in the street by someone living in your neighbourhood*

|                                  |       |       |      |        |
|----------------------------------|-------|-------|------|--------|
| ...very likely, quite likely,    | Count | 3052  | 292  | 3344   |
|                                  | %     | 91.3% | 8.7% | 100.0% |
| not very likely,                 | Count | 1281  | 109  | 1390   |
|                                  | %     | 92.2% | 7.8% | 100.0% |
| or not at all likely? Don't Know | Count | 1098  | 100  | 1198   |
|                                  | %     | 91.7% | 8.3% | 100.0% |

**Table 2: Frequency Distribution of the Response Outcome by Interviewer Categorical Variables for the Individual-Level Data**

| Category                                                                                                         | Statistic | Productive Interview | Refusals | Total  |
|------------------------------------------------------------------------------------------------------------------|-----------|----------------------|----------|--------|
| <i>Wave 8 Interviewer Grade/ Experience</i>                                                                      |           |                      |          |        |
| A; B                                                                                                             | Count     | 354                  | 42       | 396    |
|                                                                                                                  | %         | 89.4%                | 10.6%    | 100.0% |
| C, 0-4 yrs                                                                                                       | Count     | 1919                 | 229      | 2148   |
|                                                                                                                  | %         | 89.3%                | 10.7%    | 100.0% |
| C, 5yrs+                                                                                                         | Count     | 1049                 | 68       | 1117   |
|                                                                                                                  | %         | 93.9%                | 6.1%     | 100.0% |
| D, 0-4 yrs                                                                                                       | Count     | 472                  | 52       | 524    |
|                                                                                                                  | %         | 90.1%                | 9.9%     | 100.0% |
| D, 5yrs+                                                                                                         | Count     | 533                  | 48       | 581    |
|                                                                                                                  | %         | 91.7%                | 8.3%     | 100.0% |
| S, 0-4 yrs                                                                                                       | Count     | 335                  | 30       | 365    |
|                                                                                                                  | %         | 91.8%                | 8.2%     | 100.0% |
| Grade R; S, 5yrs+; T                                                                                             | Count     | 769                  | 32       | 801    |
|                                                                                                                  | %         | 96.0%                | 4.0%     | 100.0% |
| <i>Wave 8 Interviewer Age</i>                                                                                    |           |                      |          |        |
| less than 40 years                                                                                               | Count     | 166                  | 29       | 195    |
|                                                                                                                  | %         | 85.1%                | 14.9%    | 100.0% |
| 40-49 years                                                                                                      | Count     | 812                  | 85       | 897    |
|                                                                                                                  | %         | 90.5%                | 9.5%     | 100.0% |
| 50-59 years                                                                                                      | Count     | 2346                 | 213      | 2559   |
|                                                                                                                  | %         | 91.7%                | 8.3%     | 100.0% |
| 60+ years                                                                                                        | Count     | 2107                 | 174      | 2281   |
|                                                                                                                  | %         | 92.4%                | 7.6%     | 100.0% |
| <i>Interviewer Change Indicator</i>                                                                              |           |                      |          |        |
| Same interviewer                                                                                                 | Count     | 3794                 | 287      | 4081   |
|                                                                                                                  | %         | 93.0%                | 7.0%     | 100.0% |
| More than one interviewer                                                                                        | Count     | 1637                 | 214      | 1851   |
|                                                                                                                  | %         | 88.4%                | 11.6%    | 100.0% |
| <i>Wave 8 Interviewer Sex</i>                                                                                    |           |                      |          |        |
| Female                                                                                                           | Count     | 3037                 | 271      | 3308   |
|                                                                                                                  | %         | 91.8%                | 8.2%     | 100.0% |
| Male                                                                                                             | Count     | 2394                 | 230      | 2624   |
|                                                                                                                  | %         | 91.2%                | 8.8%     | 100.0% |
| <i>Wave 8 Interviewer Work History</i>                                                                           |           |                      |          |        |
| Working for another survey agency at time of survey & Done other (phone, market research) survey interviewing    | Count     | 696                  | 55       | 751    |
|                                                                                                                  | %         | 92.7%                | 7.3%     | 100.0% |
| Worked for another survey agency prior to 1st Jan 2006 & Done other (phone, market research) survey interviewing | Count     | 1440                 | 152      | 1592   |
|                                                                                                                  | %         | 90.5%                | 9.5%     | 100.0% |
| Never worked for another survey agency                                                                           | Count     | 2514                 | 230      | 2744   |
|                                                                                                                  | %         | 91.6%                | 8.4%     | 100.0% |

|                                                                                                                        |       |       |       |        |
|------------------------------------------------------------------------------------------------------------------------|-------|-------|-------|--------|
| Working for another survey agency at time of survey & Never done other (phone, market research) survey interviewing    | Count | 249   | 16    | 265    |
|                                                                                                                        | %     | 94.0% | 6.0%  | 100.0% |
| Worked for another survey agency prior to 1st Jan 2006 & Never done other (phone, market research) survey interviewing | Count | 532   | 48    | 580    |
|                                                                                                                        | %     | 91.7% | 8.3%  | 100.0% |
| <i>Wave 8 Interviewer 'Worry a Lot' Single Item Personality Trait</i>                                                  |       |       |       |        |
| 1 (Does not apply to me at all)                                                                                        | Count | 702   | 37    | 739    |
|                                                                                                                        | %     | 95.0% | 5.0%  | 100.0% |
| 2, 3                                                                                                                   | Count | 1973  | 207   | 2180   |
|                                                                                                                        | %     | 90.5% | 9.5%  | 100.0% |
| 4                                                                                                                      | Count | 1197  | 97    | 1294   |
|                                                                                                                        | %     | 92.5% | 7.5%  | 100.0% |
| 5, 6, 7 (Applies perfectly to me)                                                                                      | Count | 1559  | 160   | 1719   |
|                                                                                                                        | %     | 90.7% | 9.3%  | 100.0% |
| <i>Wave 8 Interviewer 'Express Myself Easily' Single Item Skills</i>                                                   |       |       |       |        |
| 1 (Does not apply to me at all), 2, 3                                                                                  | Count | 341   | 21    | 362    |
|                                                                                                                        | %     | 94.2% | 5.8%  | 100.0% |
| 4                                                                                                                      | Count | 703   | 53    | 756    |
|                                                                                                                        | %     | 93.0% | 7.0%  | 100.0% |
| 5, 6, 7 (Applies perfectly to me)                                                                                      | Count | 4387  | 427   | 4814   |
|                                                                                                                        | %     | 91.1% | 8.9%  | 100.0% |
| <i>Wave 8 Interviewer 'Can't Help but Look Upset When Things Go Wrong' Single Item Skills</i>                          |       |       |       |        |
| 1 (Does not apply to me at all), 2                                                                                     | Count | 1137  | 82    | 1219   |
|                                                                                                                        | %     | 93.3% | 6.7%  | 100.0% |
| 3, 4, 5                                                                                                                | Count | 3434  | 319   | 3753   |
|                                                                                                                        | %     | 91.5% | 8.5%  | 100.0% |
| 6, 7 (Applies perfectly to me)                                                                                         | Count | 860   | 100   | 960    |
|                                                                                                                        | %     | 89.6% | 10.4% | 100.0% |

**Table 3: Mean Score and Standard Deviation of the Response Outcome by Area and Interviewer Continuous Variables for the Individual-Level Data**

| Variable                                                      | Statistic      | Productive |          |
|---------------------------------------------------------------|----------------|------------|----------|
|                                                               |                | Interview  | Refusals |
| <i>Composite Measure of Negative Area Perception</i>          | Mean           | 20.05      | 19.73    |
|                                                               | Std. Deviation | 4.74       | 4.72     |
| <i>Wave 8 Interviewer Agreeableness Personality Score</i>     | Mean           | 5.69       | 5.69     |
|                                                               | Std. Deviation | 0.80       | 0.82     |
| <i>Wave 8 Interviewer Conscientiousness Personality Score</i> | Mean           | 5.86       | 5.86     |
|                                                               | Std. Deviation | 0.86       | 0.83     |
| <i>Wave 8 Interviewer Extroversion Personality Score</i>      | Mean           | 4.89       | 4.74     |
|                                                               | Std. Deviation | 1.20       | 1.25     |
| <i>Wave 8 Interviewer Neuroticism Personality Score</i>       | Mean           | 3.04       | 3.11     |
|                                                               | Std. Deviation | 1.24       | 1.13     |
| <i>Wave 8 Interviewer Openness Personality Score</i>          | Mean           | 5.10       | 5.20     |
|                                                               | Std. Deviation | 1.04       | 1.02     |

|                                                                                            |                |      |      |
|--------------------------------------------------------------------------------------------|----------------|------|------|
| <i>Wave 8 Interviewer Unavailability Score</i>                                             | Mean           | 5.66 | 5.91 |
|                                                                                            | Std. Deviation | 8.66 | 8.61 |
| <i>Wave 8 Interviewer Unwillingness Score</i>                                              | Mean           | 5.20 | 4.61 |
|                                                                                            | Std. Deviation | 8.13 | 7.24 |
| <i>Wave 8 Interviewer Composite Measure of Negative Views on Persuasion of Respondents</i> | Mean           | 2.74 | 2.73 |
|                                                                                            | Std. Deviation | 0.36 | 0.32 |
| <i>Wave 8 Interviewer Verbal Communication Skills</i>                                      | Mean           | 5.22 | 5.23 |
|                                                                                            | Std. Deviation | 0.92 | 0.88 |
| <i>Wave 8 Interviewer Adaptation Skills</i>                                                | Mean           | 5.50 | 5.46 |
|                                                                                            | Std. Deviation | 0.84 | 0.88 |
| <i>Wave 8 Interviewer Connectedness Skills</i>                                             | Mean           | 5.09 | 5.05 |
|                                                                                            | Std. Deviation | 0.82 | 0.80 |
| <i>Wave 8 Interviewer Emotional Resilience Skills</i>                                      | Mean           | 4.10 | 3.98 |
|                                                                                            | Std. Deviation | 1.09 | 1.09 |
| <i>Wave 8 Interviewer Conformity Skills</i>                                                | Mean           | 5.40 | 5.39 |
|                                                                                            | Std. Deviation | 0.90 | 0.90 |
| <i>Wave 8 Interviewer Non-Verbal Communication Skills</i>                                  | Mean           | 4.99 | 4.96 |
|                                                                                            | Std. Deviation | 1.19 | 1.17 |
| <i>Wave 8 Interviewer Assertiveness Skills</i>                                             | Mean           | 4.61 | 4.57 |
|                                                                                            | Std. Deviation | 1.22 | 1.22 |
| <i>Wave 8 Interviewer Small Talk Skills</i>                                                | Mean           | 4.22 | 4.04 |
|                                                                                            | Std. Deviation | 1.70 | 1.68 |
| <i>Wave 8 Interviewer Deliberation Skills</i>                                              | Mean           | 5.28 | 5.27 |
|                                                                                            | Std. Deviation | 0.88 | 0.90 |

**Table 4: Frequency Distribution of the Area-Level Variables for Area-Level Data**

| <b>Category</b>                 | <b>Frequency</b> | <b>Percent</b> |
|---------------------------------|------------------|----------------|
| <i>Government Office Region</i> |                  |                |
| North East                      | 12               | 8              |
| North West & Merseyside         | 16               | 10.7           |
| Yorkshire & Humber              | 13               | 8.7            |
| East Midlands                   | 20               | 13.3           |
| West Midlands                   | 18               | 12             |
| South West                      | 14               | 9.3            |
| Eastern                         | 9                | 6              |
| London                          | 12               | 8              |
| South East                      | 20               | 13.3           |
| Wales                           | 5                | 3.3            |
| Scotland                        | 11               | 7.3            |
| <i>London Indicator</i>         |                  |                |
| Not London                      | 138              | 92             |
| London                          | 12               | 8              |

**Table 5: Frequency Distribution of Interviewer-Level Variables for Interviewer-Level Data**

| <b>Category</b>                                                                                                        | <b>Frequency</b> | <b>Percent</b> |
|------------------------------------------------------------------------------------------------------------------------|------------------|----------------|
| <i>Interviewer Grade/ Experience</i>                                                                                   |                  |                |
| A; B                                                                                                                   | 26               | 9.5            |
| C, 0-4 yrs                                                                                                             | 107              | 38.9           |
| C, 5yrs+                                                                                                               | 45               | 16.4           |
| D, 0-4 yrs                                                                                                             | 19               | 6.9            |
| D, 5yrs+                                                                                                               | 25               | 9.1            |
| S, 0-4 yrs                                                                                                             | 17               | 6.2            |
| Grade R; S, 5yrs+; T                                                                                                   | 36               | 13.1           |
| <i>Interviewer Age</i>                                                                                                 |                  |                |
| less than 40 years                                                                                                     | 10               | 3.6            |
| 40-49 years                                                                                                            | 45               | 16.4           |
| 50-59 years                                                                                                            | 117              | 42.5           |
| 60+ years                                                                                                              | 103              | 37.5           |
| <i>Interviewer Change Indicator</i>                                                                                    |                  |                |
| Same interviewer                                                                                                       | 155              | 56.4           |
| More than one interviewer                                                                                              | 120              | 43.6           |
| <i>Wave 8 Interviewer Sex</i>                                                                                          |                  |                |
| Female                                                                                                                 | 152              | 55.3           |
| Male                                                                                                                   | 123              | 44.7           |
| <i>Wave 8 Interviewer Work History</i>                                                                                 |                  |                |
| Working for another survey agency at time of survey & Done other (phone, market research) survey interviewing          | 37               | 13.5           |
| Worked for another survey agency prior to 1st Jan 2006 & Done other (phone, market research) survey interviewing       | 72               | 26.2           |
| Never worked for another survey agency                                                                                 | 130              | 47.3           |
| Working for another survey agency at time of survey & Never done other (phone, market research) survey interviewing    | 12               | 4.4            |
| Worked for another survey agency prior to 1st Jan 2006 & Never done other (phone, market research) survey interviewing | 24               | 8.7            |
| <i>Wave 8 Interviewer 'Worry a Lot' Single Item Personality Trait</i>                                                  |                  |                |
| 1 (Does not apply to me at all)                                                                                        | 35               | 12.7           |
| 2, 3                                                                                                                   | 101              | 36.7           |
| 4                                                                                                                      | 60               | 21.8           |
| 5, 6, 7 (Applies perfectly to me)                                                                                      | 79               | 28.7           |
| <i>Wave 8 Interviewer 'Express Myself Easily' Single Item Personality Trait</i>                                        |                  |                |
| 1 (Does not apply to me at all), 2, 3                                                                                  | 16               | 5.8            |
| 4                                                                                                                      | 38               | 13.8           |
| 5, 6, 7 (Applies perfectly to me)                                                                                      | 221              | 80.4           |
| <i>Wave 8 Interviewer 'Can't Help but Look Upset When Things Go Wrong' Single Item Personality Trait</i>               |                  |                |
| 1 (Does not apply to me at all), 2                                                                                     | 57               | 20.7           |
| 3, 4, 5                                                                                                                | 175              | 63.6           |
| 6, 7 (Applies perfectly to me)                                                                                         | 43               | 15.6           |

**Table 6: Mean Score and Standard Deviation for Interviewer-Level Continuous Variables for Interviewer-Level Data**

| <b>Variable</b>                                                                     | <b>Statistic</b> |      |
|-------------------------------------------------------------------------------------|------------------|------|
|                                                                                     | Mean             | 5.72 |
| Wave 8 Interviewer Agreeableness Personality Score                                  | Std. Deviation   | 0.82 |
| Wave 8 Interviewer Conscientiousness Personality Score                              | Mean             | 5.81 |
|                                                                                     | Std. Deviation   | 0.88 |
| Wave 8 Interviewer Extroversion Personality Score                                   | Mean             | 4.85 |
|                                                                                     | Std. Deviation   | 1.20 |
| Wave 8 Interviewer Neuroticism Personality Score                                    | Mean             | 3.04 |
|                                                                                     | Std. Deviation   | 1.21 |
| Wave 8 Interviewer Openness Personality Score                                       | Mean             | 5.16 |
|                                                                                     | Std. Deviation   | 1.02 |
| Wave 8 Interviewer Unavailability Score                                             | Mean             | 5.91 |
|                                                                                     | Std. Deviation   | 8.94 |
| Wave 8 Interviewer Unwillingness Score                                              | Mean             | 4.92 |
|                                                                                     | Std. Deviation   | 7.91 |
| Wave 8 Interviewer Composite Measure of Negative Views on Persuasion of Respondents | Mean             | 2.73 |
|                                                                                     | Std. Deviation   | 0.34 |
| Wave 8 Interviewer Verbal Communication Skills                                      | Mean             | 5.08 |
|                                                                                     | Std. Deviation   | 0.82 |
| Wave 8 Interviewer Adaptation Skills                                                | Mean             | 5.48 |
|                                                                                     | Std. Deviation   | 0.85 |
| Wave 8 Interviewer Connectedness Skills                                             | Mean             | 5.08 |
|                                                                                     | Std. Deviation   | 0.82 |
| Wave 8 Interviewer Emotional Resilience Skills                                      | Mean             | 4.07 |
|                                                                                     | Std. Deviation   | 1.10 |
| Wave 8 Interviewer Conformity Skills                                                | Mean             | 5.38 |
|                                                                                     | Std. Deviation   | 0.93 |
| Wave 8 Interviewer Non-Verbal Communication Skills                                  | Mean             | 5.02 |
|                                                                                     | Std. Deviation   | 1.18 |
| Wave 8 Interviewer Assertiveness Skills                                             | Mean             | 4.57 |
|                                                                                     | Std. Deviation   | 1.23 |
| Wave 8 Interviewer Small Talk Skills                                                | Mean             | 4.21 |
|                                                                                     | Std. Deviation   | 1.66 |
| Wave 8 Interviewer Deliberation Skills                                              | Mean             | 5.30 |
|                                                                                     | Std. Deviation   | 0.90 |
